# Supplementary material for: Health equity and wellbeing among older people’s caregivers in New Zealand during COVID-19: Protocol for a qualitative study
Source: PLOS journal article supplement (doi:10.1371/journal.pone.0271114), 2022-07-15
Supplement: S1 (10.1371/journal.pone.0271114.s001) [file journal.pone.0271114.s001]

## Health Equity & Wellbeing among older people's caregivers during COVID 19 restrictions

### Demographic Questions: Caregivers

Demographic Questions: Caregivers Study ID #: \_\_\_\_\_ multiple caregivers #: \_\_\_\_\_

1. How old are you? ( in years) \_\_\_\_\_
2. To which gender identity do you most identify? ☐ Male ☐ Female ☐ Gender diverse
3. What is your current marital status? ☐ Married ☐ De Facto ☐ Divorced ☐ Separated  
☐ Widowed ☐ Never married
4. To which ethnicity do you identify? Please tick ☐ Māori ☐ NZ European ☐ Samoan ☐ Cook Island Māori  
all that apply, and if possible, ☐ Tongan ☐ Niuean ☐ Fijian ☐ Chinese  
circle one that you most identify with ☐ Indian ☐ Other \_\_\_\_\_
5. What is your first or home language? \_\_\_\_\_
6. What is your **highest** level of schooling you achieved? (tick only one) ☐ Primary (or less) ☐ High School (not completed) ☐ High School (completed) ☐ Trade  
☐ University or Polytec undergraduate ☐ University postgraduate

Approved by the University Of Auckland Health Research Ethics Committee on 31/05/2021 for three years. Reference Number AH21966
